# Supplementary material for: Brain evolution in Proboscidea (Mammalia, Afrotheria) across the Cenozoic
Source: PubMed Central journal article supplement (PMC6597534; doi:10.1038/s41598-019-45888-4), 2019-06-27

Brain evolution in Proboscidea (Mammalia, Afrotheria) across the Cenozoic

Julien Benoit<sup>1\*</sup>, Lucas J. Legendre<sup>2</sup>, Rodolphe Tabuce<sup>3</sup>, Theodor Obada<sup>4</sup>, Vladislav Mararescu<sup>4</sup>,  
Paul Manger<sup>5</sup>

<sup>1</sup>Evolutionary Studies Institute (ESI), University of the Witwatersrand, Braamfontein, 2050,  
Johannesburg, South Africa

<sup>2</sup>Jackson School of Geosciences, The University of Texas at Austin, 2275 Speedway Stop  
C9000, Austin, TX, United States

<sup>3</sup>Institut des Sciences de L'Evolution de Montpellier, Université Montpellier 2, Place Eugène  
Batillon, F-34095 Montpellier cedex 05, Montpellier, France

<sup>4</sup>Academy of Sciences of Moldova, Institute of Zoology, Chişinău, Moldova

<sup>5</sup>School of Anatomical Sciences, University of the Witwatersrand, 7 York Road, Parktown,  
2193, Johannesburg, South Africa

Correspondance to: [Julien.benoit@wits.ac.za](mailto:Julien.benoit@wits.ac.za)

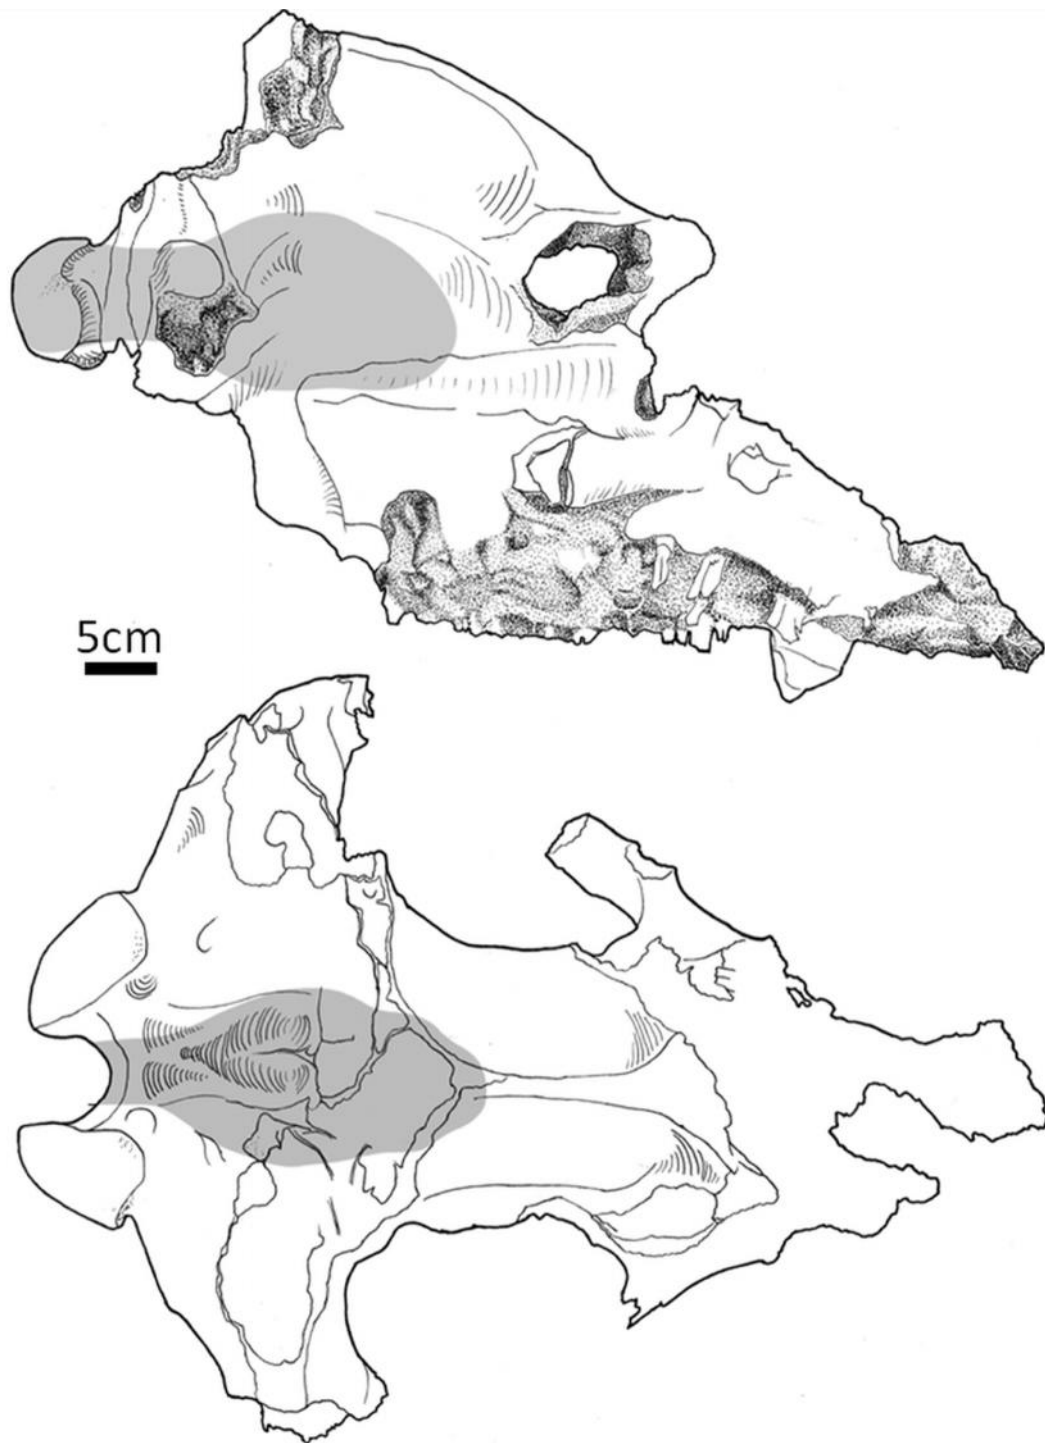

**Supplementary figure 1.** The endocranial cast of *Palaeomastodon beadnelli* reconstructed inside the transparent skull (NHMUK 8464). Top, lateral view; bottom: dorsal view. Artwork by Sophie Vrad.

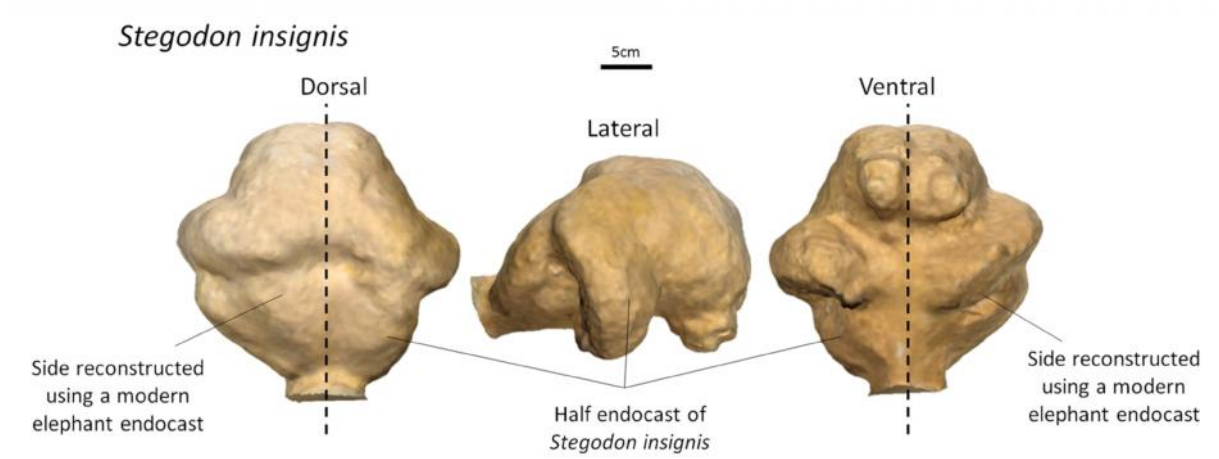

**Supplementary figure 2.** The digitized endocranial cast of *Stegodon insignis* (MNHN-A952).

Left, dorsal view; middle: lateral view; right, ventral view.

*Zygodon (Mammot) borsoni*

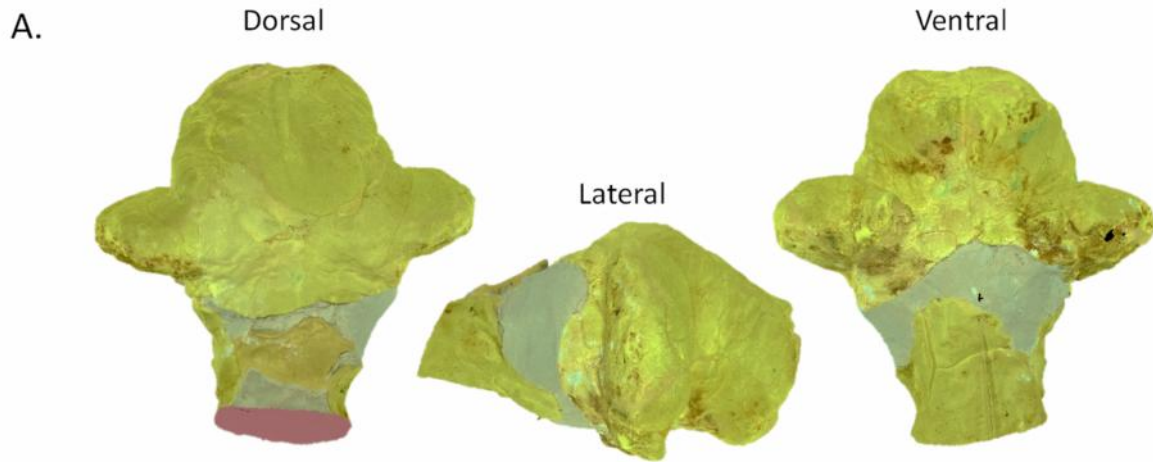

B.

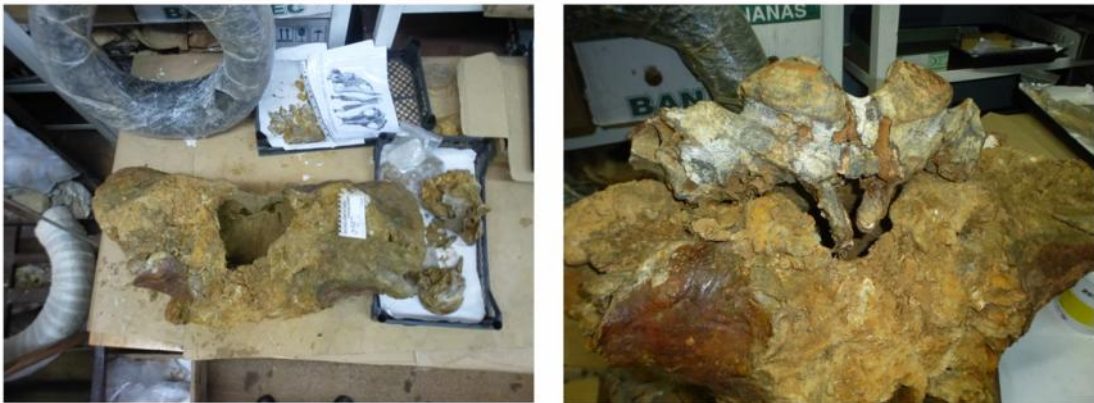

**Supplementary figure 3.** The endocranial cast of *Zygodon (Mammot) borsoni* (MCFFM-CLB-1). A. The digitized endocast. Left, dorsal view; middle: lateral view; right, ventral view. B. Photos of the actual specimen showing the prepared braincase in caudal view (left) with the occipital condyles removed and in ventral view (right) with the occipital condyles in place.

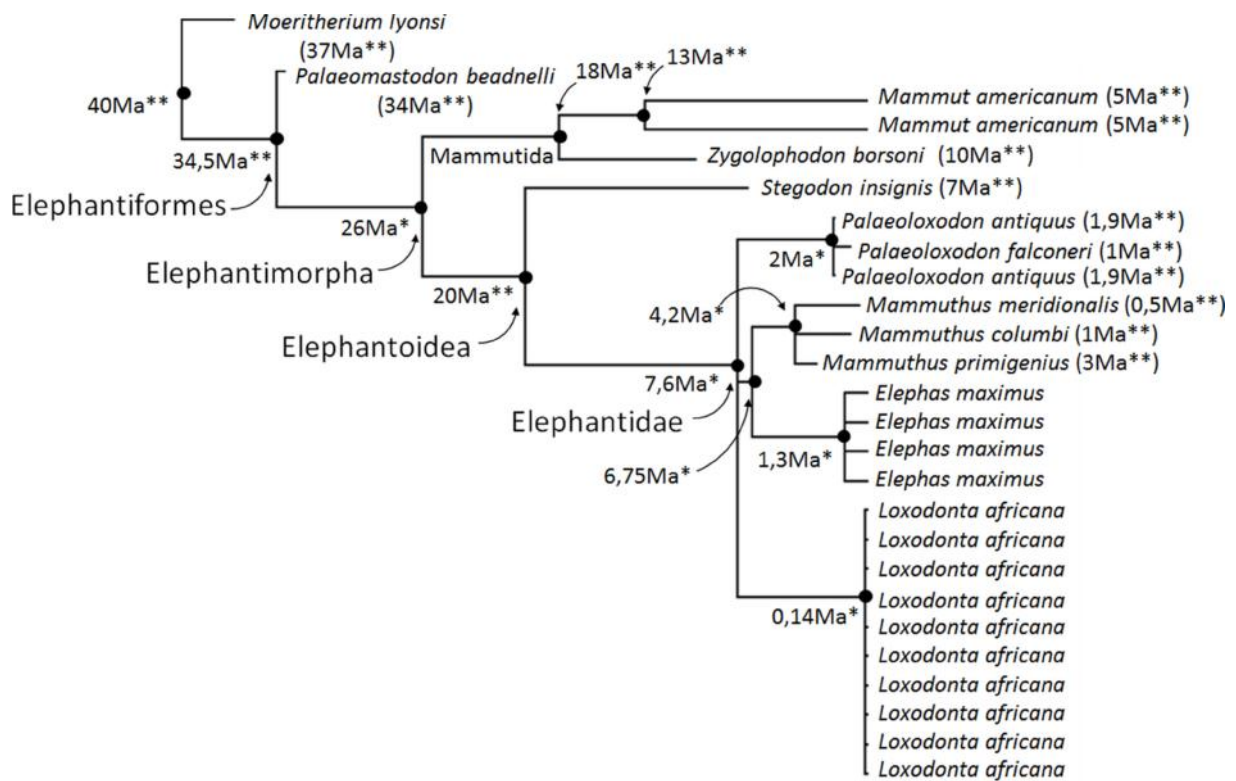

**Supplementary figure 4.** The phylogeny and divergence ages used for the Ancestral Character State Reconstruction using Maximum Likelihood (Source of the tree: see material and methods). Divergence ages and earliest occurrence in the fossil record in million years (Ma) from: \*, ref [24]; \*\*, ref [41].

**Supplementary material 5.** Script from the nexus file containing the dataset and time calibrated phylogenetic tree used for this work.

#NEXUS

[written Fri Aug 24 07:41:49 CAT 2018 by Mesquite version 2.75 (build 564) at  
User/146.141.25.99]

BEGIN TAXA;

TITLE Taxa;

DIMENSIONS NTAX=26;

TAXLABELS

Elephas\_maximus\_1 Elephas\_maximus\_2 Elephas\_maximus\_3  
Elephas\_maximus\_4 Loxodonta\_africana\_1 Loxodonta\_africana\_2 Loxodonta\_africana\_3  
Loxodonta\_africana\_4 Loxodonta\_africana\_5 Loxodonta\_africana\_7 Loxodonta\_africana\_8  
Loxodonta\_africana\_9 Loxodonta\_africana\_10 Loxodonta\_africana\_11 Palaeoloxodon\_falconeri  
Palaeoloxodon\_antiquus\_1 Palaeoloxodon\_antiquus\_2 Mammuthus\_primigenius  
Mammuthus\_meridionalis Mammuthus\_columbi Mammut\_americanum\_1  
Mammut\_americanum\_2 Zygolophodon\_borsoni Palaeomastodon\_beadnelli  
Moeritherium\_lyonsi Stegodon\_insignis

;

END;

BEGIN TREES;

Title Afrotheria\_tree\_block;

LINK Taxa = Taxa;

TRANSLATE

1 Elephas\_maximus\_1,

2 Elephas\_maximus\_2,

3 Elephas\_maximus\_3,

4 Elephas\_maximus\_4,

5 Loxodonta\_africana\_1,

6 Loxodonta\_africana\_2,

7 Loxodonta\_africana\_3,

8 Loxodonta\_africana\_4,

9 Loxodonta\_africana\_5,

10 Loxodonta\_africana\_7,

11 Loxodonta\_africana\_8,

12 Loxodonta\_africana\_9,

- 13 *Loxodonta africana\_10*,
- 14 *Loxodonta africana\_11*,
- 15 *Palaeoloxodon falconeri*,
- 16 *Palaeoloxodon antiquus\_1*,
- 17 *Palaeoloxodon antiquus\_2*,
- 18 *Mammuthus primigenius*,
- 19 *Mammuthus meridionalis*,
- 20 *Mammuthus columbi*,
- 21 *Mammut americanum\_1*,
- 22 *Mammut americanum\_2*,
- 23 *Zygodolophodon borsoni*,
- 24 *Palaeomastodon beadnelli*,
- 25 *Moeritherium lyonsi*,
- 26 *Stegodon insignis*;

TREE 'Afrotheria+++++' =

```

(((((((1:1.3,2:1.3,3:1.3,4:1.3):5.45,(20:3.2,18:3.7,19:1.2[%selected = on
]):2.55):0.85,(5:0.14,6:0.14,7:0.14,8:0.14,9:0.14,10:0.14,11:0.14,12:0.14,13:0.14,14:0.14):7.46,(
15:1.0,17:0.1,16:0.1):5.6):12.4,26:13.0):6.0,(23:8.0,(21:13.0,22:13.0):5.0):8.0):8.5,24:0.5):5.5,25
:3.0)[% ] [% ] [% setBetweenBits = selected ];
```

ID 01615222172334;



END;

Begin MESQUITE;

MESQUITESCRIPTVERSION 2;

TITLE AUTO;

tell ProjectCoordinator;

timeSaved 1535089309830;

getEmployee #mesquite.minimal.ManageTaxa.ManageTaxa;

tell It;

setID 0 1429675756028057823;

endTell;

getWindow;

tell It;

suppress;

setResourcesState false false 147;

setPopoutState 400;

setExplanationSize 0;

setAnnotationSize 0;

setFontIncAnnot 0;

setFontIncExp 0;

setSize 1348 629;

setLocation -8 0;

setFont SanSerif;

setFontSize 10;

getToolPalette;

tell It;

endTell;

desuppress;

endTell;

getEmployee #mesquite.minimal.ManageTaxa.ManageTaxa;

tell It;

showTaxa #1429675756028057823 #mesquite.lists.TaxonList.TaxonList;

tell It;

setTaxa #1429675756028057823;

getWindow;

tell It;

```
newAssistant
#mesquite.lists.DefaultTaxaOrder.DefaultTaxaOrder;

newAssistant
#mesquite.lists.TaxonListCurrPartition.TaxonListCurrPartition;

setExplanationSize 30;

setAnnotationSize 20;

setFontIncAnnot 0;

setFontIncExp 0;

setSize 1201 562;

setLocation -8 0;

setFont SanSerif;

setFontSize 10;

getToolPalette;

tell It;

setTool

mesquite.lists.TaxonList.TaxonListWindow.ibeam;

endTell;

endTell;

showWindow;

getEmployee #mesquite.lists.ColorTaxon.ColorTaxon;
```

```
        tell It;

            setColor Red;

            removeColor off;

        endTell;

        getEmployee

#mesquite.lists.TaxonListAnnotPanel.TaxonListAnnotPanel;

        tell It;

            togglePanel off;

        endTell;

    endTell;

endTell;

getEmployee #mesquite.trees.BasicTreeWindowCoord.BasicTreeWindowCoord;

tell It;

    makeTreeWindow #1429675756028057823

#mesquite.trees.BasicTreeWindowMaker.BasicTreeWindowMaker;

    tell It;

        suppressEPCResponse;

        setTreeSource #mesquite.trees.StoredTrees.StoredTrees;

    tell It;

        setTreeBlock 1;
```

```
toggleUseWeights off;

endTell;

setAssignedID 870.1521201595448.1420569832980180438;

getTreeWindow;

tell It;

    setExplanationSize 30;

    setAnnotationSize 20;

    setFontIncAnnot 0;

    setFontIncExp 0;

    setSize 1201 562;

    setLocation -8 0;

    setFont SanSerif;

    setFontSize 10;

    getToolPalette;

    tell It;

        setTool

mesquite.trees.BasicTreeWindowMaker.BasicTreeWindow.arrow;

endTell;

setActive;
```

```
getTreeDrawCoordinator
#mesquite.trees.BasicTreeDrawCoordinator.BasicTreeDrawCoordinator;

tell It;

    suppress;

    setTreeDrawer #mesquite.trees.SquareTree.SquareTree;

    tell It;

        setNodeLocs
#mesquite.trees.NodeLocsStandard.NodeLocsStandard;

        tell It;

            branchLengthsToggle on;

            toggleScale on;

            toggleBroadScale off;

            toggleCenter on;

            toggleEven on;

        endTell;

        setEdgeWidth 2;

        orientUp;

        setCornerMode Right_Angle 50;

    endTell;

    setBackground White;
```

```
setBranchColor Black;

showNodeNumbers off;

showBranchColors on;

labelBranchLengths on;

centerBrLenLabels on;

showBrLensUnspecified on;

showBrLenLabelsOnTerminals on;

setBrLenLabelColor 250 10 10;

setNumBrLenDecimals 6;

desuppress;

getEmployee
```

```
#mesquite.trees.BasicDrawTaxonNames.BasicDrawTaxonNames;
```

```
tell It;

    setFontSize 12;

    setColor Black;

    toggleColorPartition on;

    toggleShadePartition off;

    toggleShowFootnotes on;

    toggleNodeLabels on;

    toggleCenterNodeNames off;
```

```
toggleShowNames on;

namesAngle ?;

endTell;

endTell;

setTreeNumber 1;

setDrawingSizeMode 0;

toggleLegendFloat on;

scale 0;

toggleTextOnTree off;

showWindow;

endTell;

desuppressEPCResponse;

getEmployee #mesquite.trees.ColorBranches.ColorBranches;

tell It;

setColor Red;

removeColor off;

endTell;

getEmployee #mesquite.ornamental.BranchNotes.BranchNotes;

tell It;
```



```
        setAlwaysOn off;

    endTell;

    getEmployee

#mesquite.ornamental.ColorTreeByPartition.ColorTreeByPartition;

    tell It;

        colorByPartition off;

    endTell;

    getEmployee

#mesquite.ornamental.DrawTreeAssocDoubles.DrawTreeAssocDoubles;

    tell It;

        setOn on;

        setDigits 4;

        writeAsPercentage off;

        toggleCentred on;

        toggleHorizontal on;

        toggleWhiteEdges on;

        setFontSize 10;

        setOffset 0 0;

    endTell;
```

```
        getEmployee
#mesquite.ornamental.DrawTreeAssocStrings.DrawTreeAssocStrings;

        tell It;

                setOn on;

                toggleCentred on;

                toggleHorizontal on;

                setFontSize 10;

                setOffset 0 0;

        endTell;

        getEmployee #mesquite.trees.TreeInfoValues.TreeInfoValues;

        tell It;

                panelOpen false;

        endTell;

    endTell;

endTell;

endTell;

end;
```

**Supplementary material 6.** Outputs of the regressions of log brain mass over log body corrected for phylogeny including (A) and excluding outliers (B).

# Endocranial volume v body mass for 26 proboscidean specimens

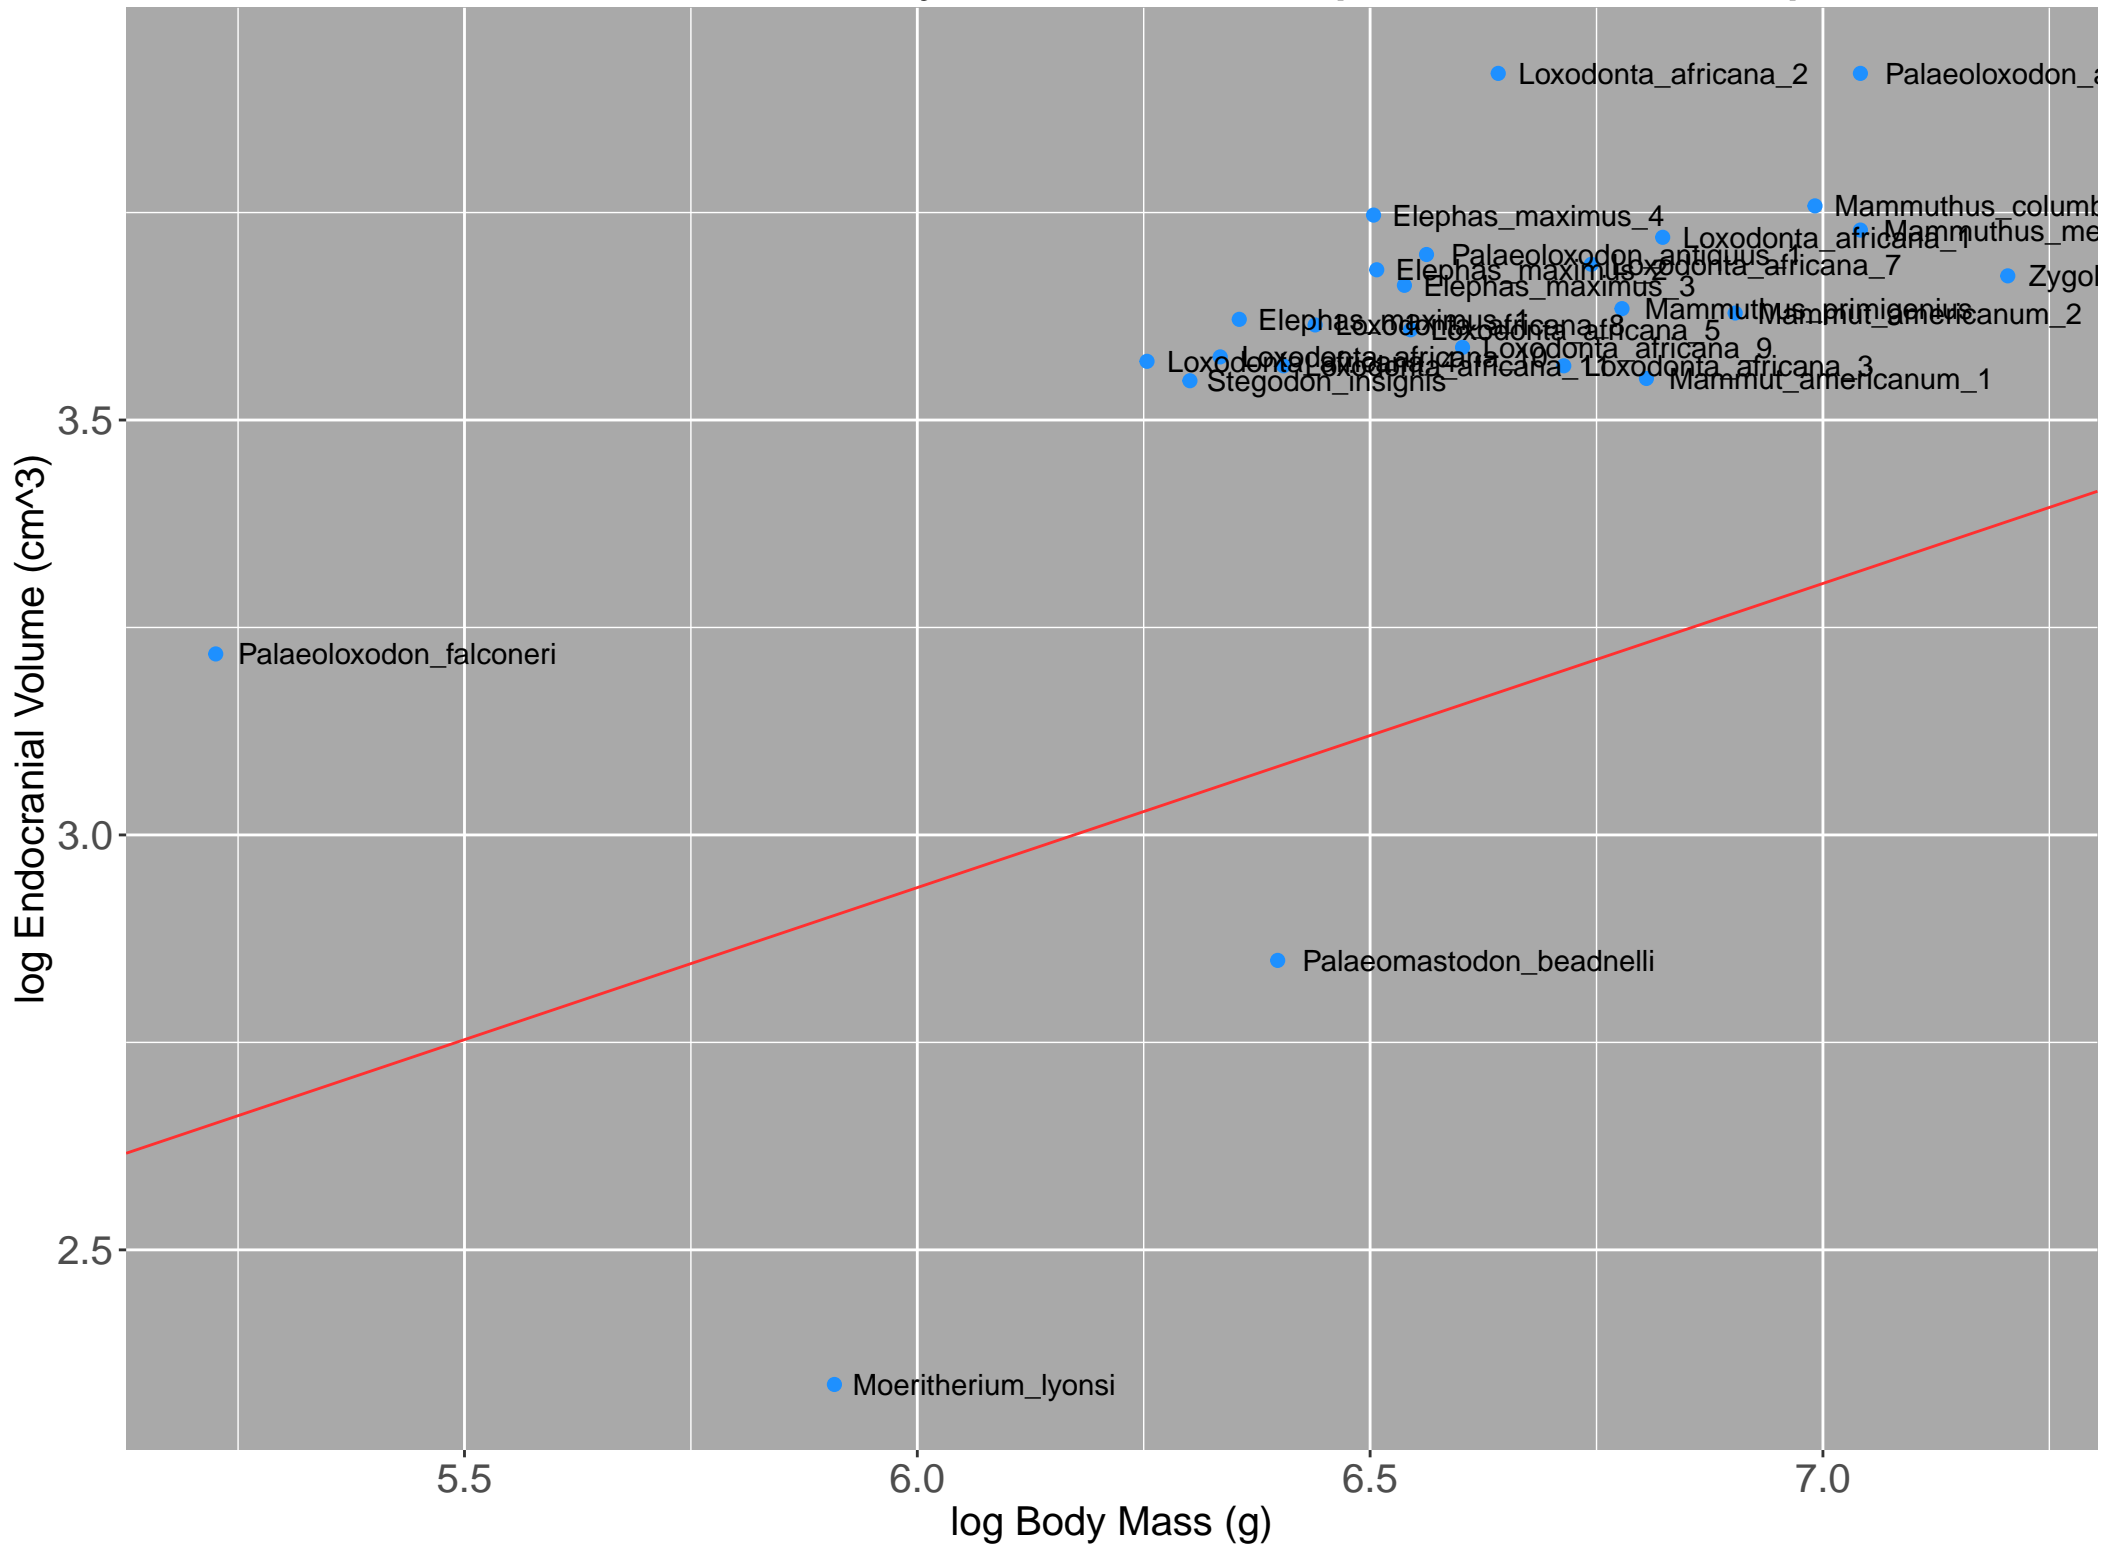

# Endocranial volume v body mass for 19 proboscidean specimens

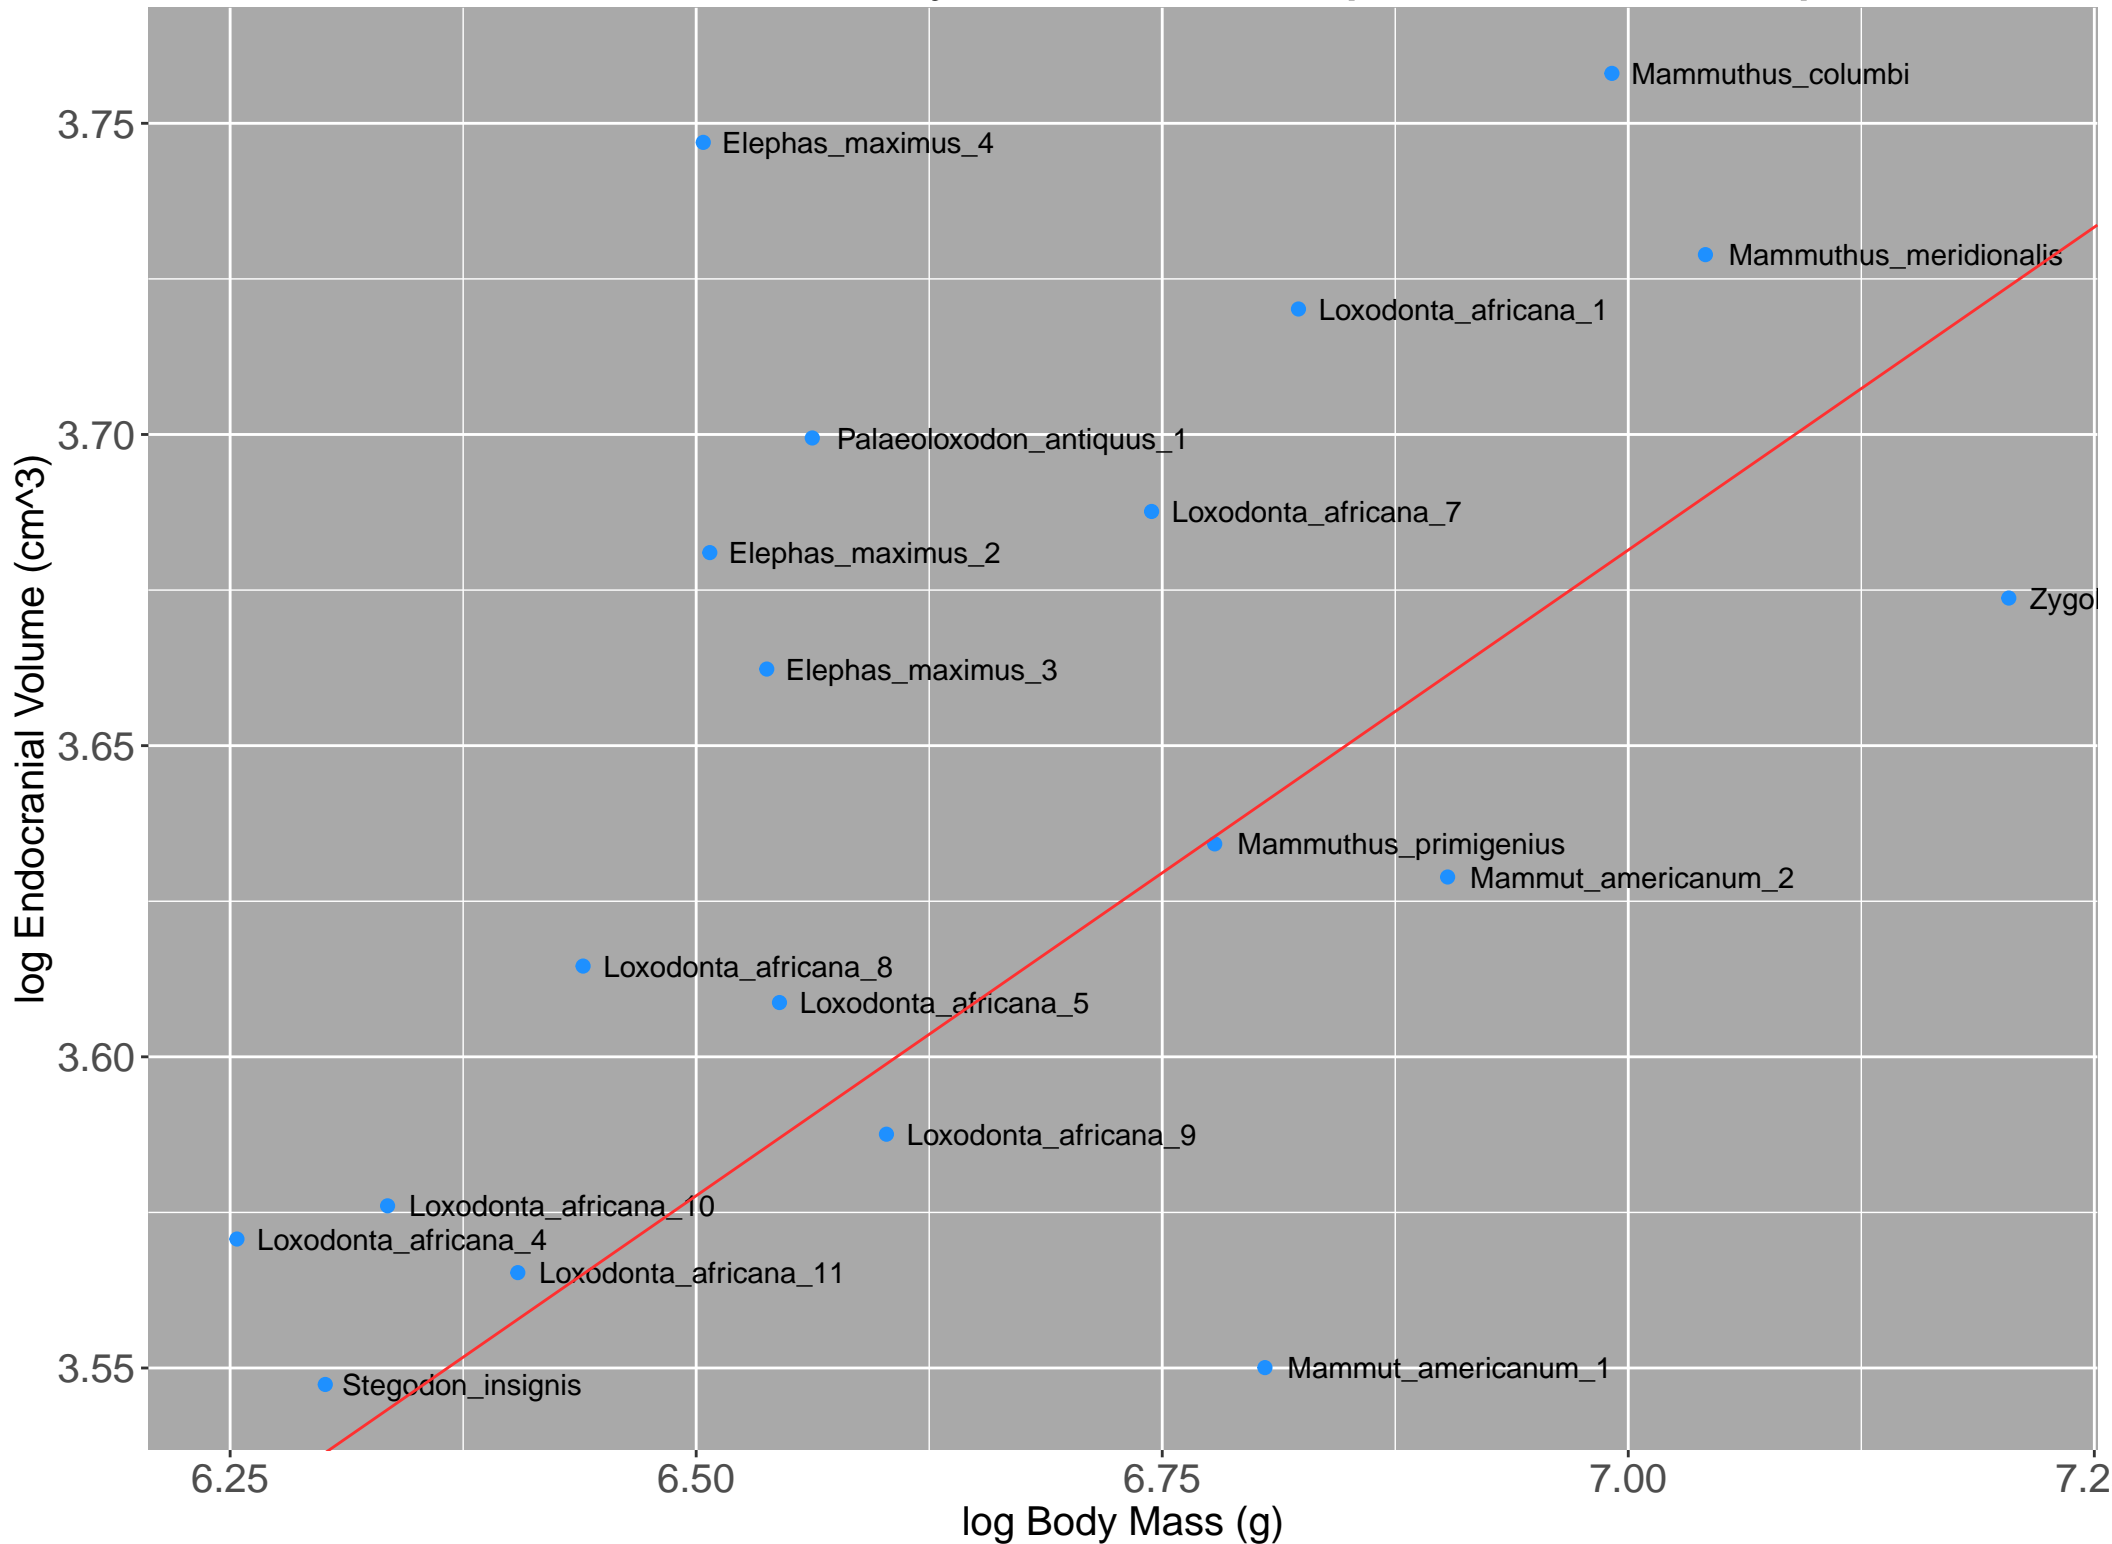

Supplement: 41598_2019_45888_MOESM1_ESM.pdf [file 41598_2019_45888_MOESM1_ESM.pdf]
